# Supplementary material for: Photophysics of manisyl-substituted 2-pyridin-2-yl-1,10-phenanthrolines. Dual emission dependent on structure and solvent
Source: Royal Society of Chemistry journal article supplement (doi:10.1039/b818533f), 2009-01-01
Supplement: b818533f.pdf [file b818533f.pdf]

## Photophysics of manisyl-substituted 2-pyridin-2-yl-1,10-phenanthrolines. Dual emission dependant on structure and solvent.

---

Jeremy K. Klosterman, Kim K. Baldrige and Jay S. Siegel\*<sup>a</sup>

<sup>a</sup>*Organisch-chemisches Institut, Universität Zürich Winterthurerstrasse 190 Zürich, Switzerland CH-8057. E-mail: jss@oci.uzh.ch*

### Supporting Information:

- Table S1** Absorption data for pyridyl-phenanthrolines **I $\alpha$ –I $\gamma$** .  
**Table S2** Absorption data for pyridyl-phenanthrolines **II( $\alpha$ – $\gamma$ )**  
**Table S3** Absorption data for pyridyl-phenanthrolines **III $\alpha$ –III $\gamma$**   
**Figure S1** Solvent dependence of the absorption maxima for the first transition.  
**Figure S2** Dependence of fluorescence quantum yield on solvent polarity.  
**Figure S3** Excitation spectra of manisyl-substituted pyridyl-phenanthrolines [**I–III**  $\times$   $\alpha$ – $\gamma$ ].  
**Figure S4** Representative experimental fluorescence decay curves of **II $\beta$** .  
**Figure S5** Representative fluorescence decay curve residuals of **II $\beta$** .  
**Figure S6** Mean fluorescence lifetimes *vs* solvent polarity  $E_T(N)$  values.  
**Figure S7** Radiative rate constants  $k_f$  *vs* solvent polarity  $E_T(N)$  values.  
**Figure S8** Calculated energies for the frontier orbitals of 1,10-phenanthroline, terpyridine, and 2-pyridin-2-yl-phenanthroline.  
**Figure S9** Unoccupied low-lying  $a_2(\chi)$  and  $b_1(\gamma)$  orbitals of phenanthrolines.

**Table S1** Absorption data for pyridyl-phenanthrolines  
**I $\alpha$ -I $\gamma$ .**

|                             | solvent                         | $\lambda_{\max}$ | $\epsilon_{\max}$ | $\lambda_{\max}$ | $\epsilon_{\max}$ |
|-----------------------------|---------------------------------|------------------|-------------------|------------------|-------------------|
| <b>I<math>\alpha</math></b> | EtOH                            | 293              | 32600             | 351              | 4300              |
|                             | CH <sub>3</sub> CN              | 293              | 31800             | 351              | 4000              |
|                             | CH <sub>2</sub> Cl <sub>2</sub> | 294              | 32600             | 352              | 5100              |
|                             | Et <sub>2</sub> O               | 285              | 31800             | 352              | 4300              |
|                             | CH                              | 284              | 26000             | 352              | 4100              |
| <b>I<math>\beta</math></b>  | EtOH                            | 299              | 32400             | 353              | 7800              |
|                             | CH <sub>3</sub> CN              | 296              | 33300             | 354              | 7000              |
|                             | CH <sub>2</sub> Cl <sub>2</sub> | 298              | 33200             | 354              | 8100              |
|                             | Et <sub>2</sub> O               | 295              | 35100             | 353              | 7500              |
|                             | CH                              | 296              | 31900             | 353              | 7700              |
| <b>I<math>\gamma</math></b> | EtOH                            | 287              | 16300             | 352              | 2300              |
|                             | CH <sub>3</sub> CN              | 291              | 14900             | 352              | 1900              |
|                             | CH <sub>2</sub> Cl <sub>2</sub> | 286              | 19000             | 352              | 2800              |
|                             | Et <sub>2</sub> O               | 284              | 16200             | 351              | 2400              |
|                             | CH                              | 283              | 10900             | 351              | 2400              |

<sup>a</sup>  $\lambda_{\max}$  in nm.

**Table S2** Absorption data for pyridyl-phenanthrolines  
**II( $\alpha$ - $\gamma$ )**

|                              | solvent                         | $\lambda_{\max}$ | $\epsilon_{\max}$ | $\lambda_{\max}$ | $\epsilon_{\max}$ | $\lambda_{\max}$ | $\epsilon_{\max}$ |
|------------------------------|---------------------------------|------------------|-------------------|------------------|-------------------|------------------|-------------------|
| <b>II<math>\alpha</math></b> | EtOH                            | 295              | 31200             | 310              | 26160             | 353              | 4000              |
|                              | CH <sub>3</sub> CN              | 294              | 45800             | 310              | 36115             | 353              | 5300              |
|                              | CH <sub>2</sub> Cl <sub>2</sub> | 295              | 39400             | 310              | 36115             | 354              | 5100              |
|                              | Et <sub>2</sub> O               | 294              | 44400             | 312              | 34778             | 353              | 5200              |
|                              | CH                              | 293              | 20300             | 312              | 16117             | 353              | 2500              |
| <b>II<math>\beta</math></b>  | EtOH                            | 298              | 37800             | 313              | 35663             | 354              | 8500              |
|                              | CH <sub>3</sub> CN              | 297              | 39200             | 311              | 36240             | 354              | 8500              |
|                              | CH <sub>2</sub> Cl <sub>2</sub> | 298              | 42100             | 313              | 37573             | 355              | 9200              |
|                              | Et <sub>2</sub> O               | 295              | 44400             | 313              | 40389             | 354              | 8300              |
|                              | CH                              | 296              | 37700             | 313              | 33950             | 353              | 7800              |
| <b>II<math>\gamma</math></b> | EtOH                            | 295              | 38100             | 309              | 31005             | 353              | 4300              |
|                              | CH <sub>3</sub> CN              | 294              | 38600             | 308              | 29346             | 353              | 4000              |
|                              | CH <sub>2</sub> Cl <sub>2</sub> | 295              | 38600             | 309              | 29846             | 353              | 4300              |
|                              | Et <sub>2</sub> O               | 293              | 39500             | 309              | 29765             | 352              | 4000              |
|                              | CH                              | 294              | 37500             | 309              | 28974             | 353              | 4000              |

<sup>a</sup>  $\lambda_{\max}$  in nm.

**Table S3.** Absorption data for pyridyl-phenanthrolines  
**III $\alpha$ -III $\gamma$**

|                               | solvent                         | $\lambda_{\max}$ | $\epsilon_{\max}$ | $\lambda_{\max}$ | $\epsilon_{\max}$ | $\lambda_{\max}$ | $\epsilon_{\max}$ |
|-------------------------------|---------------------------------|------------------|-------------------|------------------|-------------------|------------------|-------------------|
| <b>III<math>\alpha</math></b> | EtOH                            | 289              | 36300             | 316              | 25600             | 352              | 4400              |
|                               | CH <sub>3</sub> CN              | 287              | 36700             | 314              | 26300             | 352              | 4700              |
|                               | CH <sub>2</sub> Cl <sub>2</sub> | 288              | 33600             | 317              | 23700             | 352              | 4800              |
|                               | Et <sub>2</sub> O               | 287              | 35400             | 315              | 27600             | 353              | 4800              |
|                               | CH                              | 287              | 33700             | 315              | 26600             | 352              | 4900              |
| <b>III<math>\beta</math></b>  | EtOH                            | 293              | 18100             | 316              | 15000             | 353              | 4900              |
|                               | CH <sub>3</sub> CN              | 291              | 29700             | 315              | 24900             | 353              | 4900              |
|                               | CH <sub>2</sub> Cl <sub>2</sub> | 293              | 26400             | 319              | 22000             | 353              | 7500              |
|                               | Et <sub>2</sub> O               | 290              | 30900             | 315              | 27600             | 355              | 6900              |
|                               | CH                              | 290              | 22900             | 315              | 19000             | 353              | 7500              |
| <b>III<math>\gamma</math></b> | EtOH                            | 291              | 36900             | 313              | 24400             | 354              | 5400              |
|                               | CH <sub>3</sub> CN              | 288              | 37900             | 312              | 24500             | 352              | 4500              |
|                               | CH <sub>2</sub> Cl <sub>2</sub> | 290              | 36500             | 315              | 23800             | 352              | 4800              |
|                               | Et <sub>2</sub> O               | 288              | 38200             | 313              | 27200             | 353              | 5100              |
|                               | CH                              | 288              | 31100             | 313              | 23000             | 352              | 5100              |

<sup>a</sup>  $\lambda_{\max}$  in nm.

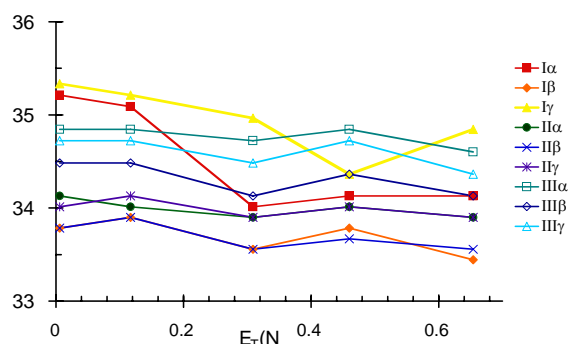

**Figure S1.** Solvent dependence of the absorption maxima for the first transition.

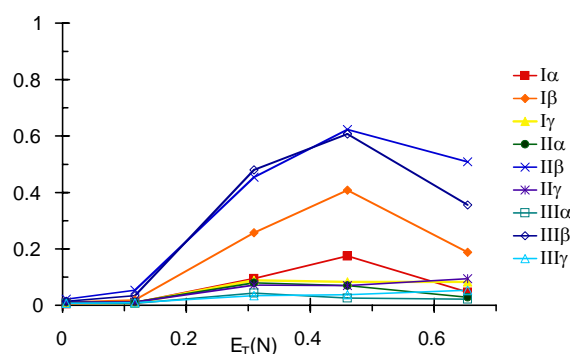

**Figure S2.** Dependence of fluorescence quantum yield on solvent polarity.

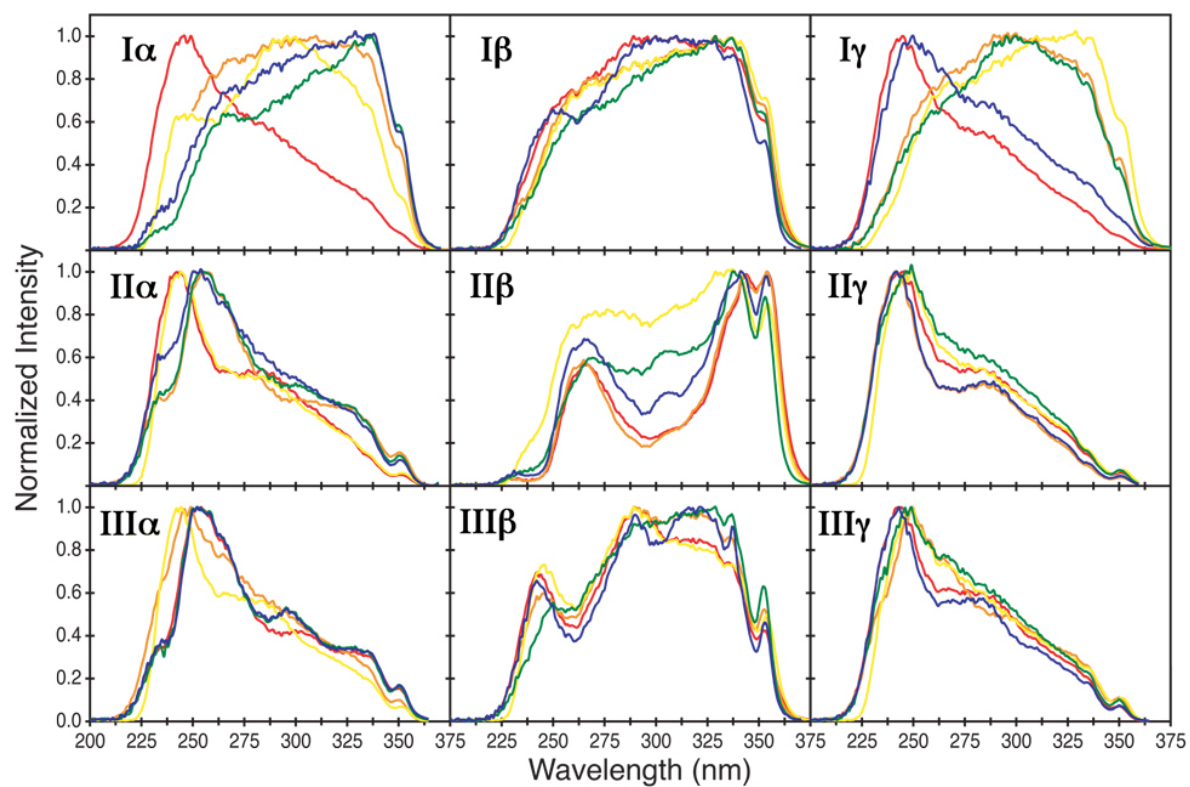

**Figure S3.** Excitation spectra of manisyl-substituted pyridyl-phenanthrolines [I-III ×  $\alpha$ - $\gamma$ ] in ethanol (red), acetonitrile (orange), methylene chloride (yellow), diethyl ether (green), and cyclohexane (blue) at room temperature.

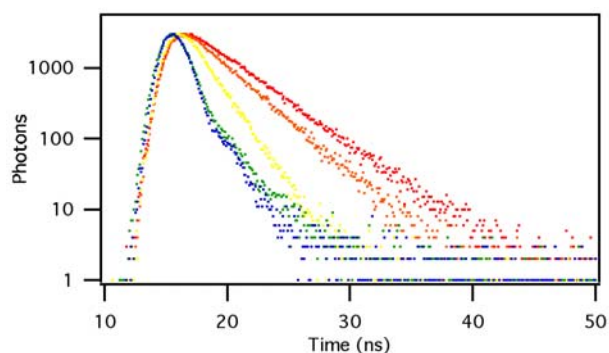

**Figure S4** Representative experimental fluorescence decay curves of **II $\beta$**  in ethanol (red), acetonitrile (orange), methylene chloride (yellow), diethyl ether (green), and cyclohexane (blue) at room temperature.

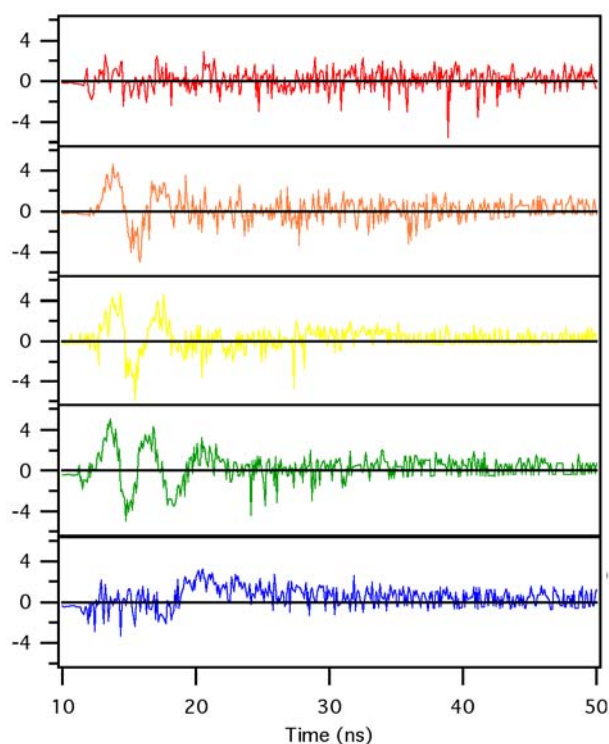

**Figure S5** Representative fluorescence decay curve residuals of **II $\beta$**  in ethanol (red), acetonitrile (orange), methylene chloride (yellow), diethyl ether (green), and cyclohexane (blue) at room temperature.

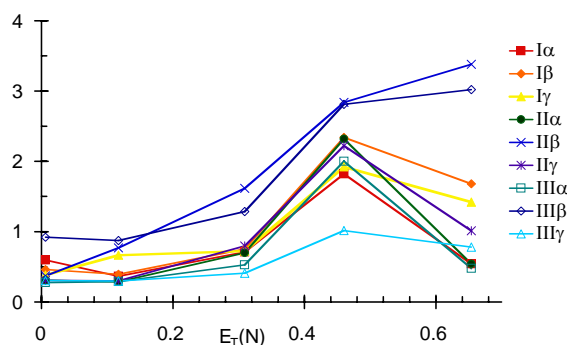

**Figure S6** Mean fluorescence lifetimes vs solvent polarity  $E_T(N)$  values.

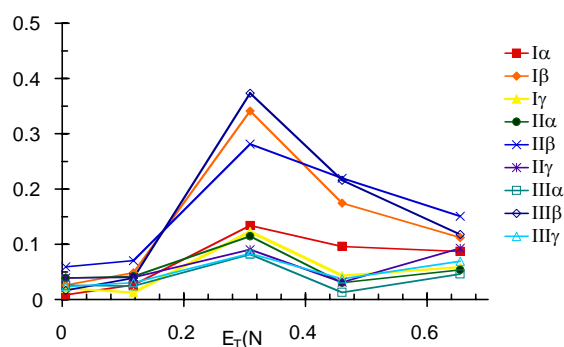

**Figure S7** Radiative rate constants  $k_f$  vs solvent polarity  $E_T(N)$  values.

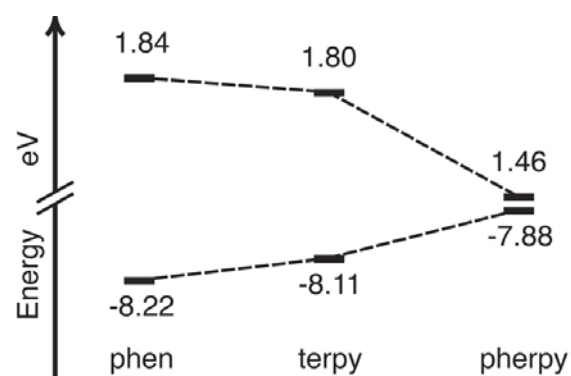

**Figure S8.** Calculated energies for the frontier orbitals of 1,10-phenanthroline (**phen**) **A**, terpyridine (**terpy**) **B**, and 2-pyridin-2-yl-phenanthroline (**pherpy**) **C**. The LUMO orbitals have positive energies while the energies are negative for the HOMO orbitals

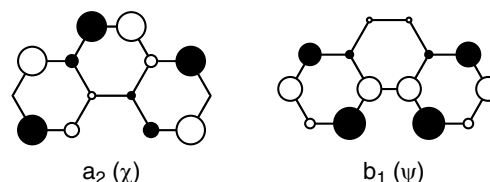

**Figure S9** Unoccupied low-lying  $a_2(\chi)$  and  $b_1(\psi)$  orbitals of phenanthrolines.
